# Supplementary material for: A Transparent AI Model for Predicting Post-Thrombolytic Outcomes in Acute Ischemic Stroke Patients
Source: Research Square preprint supplement (doi:10.21203/rs.3.rs-7300391/v1), 2025-09-22
Supplement: Supplementary file 1 [file b09fe968868090361557def4.docx]

**Supplementary Figures**


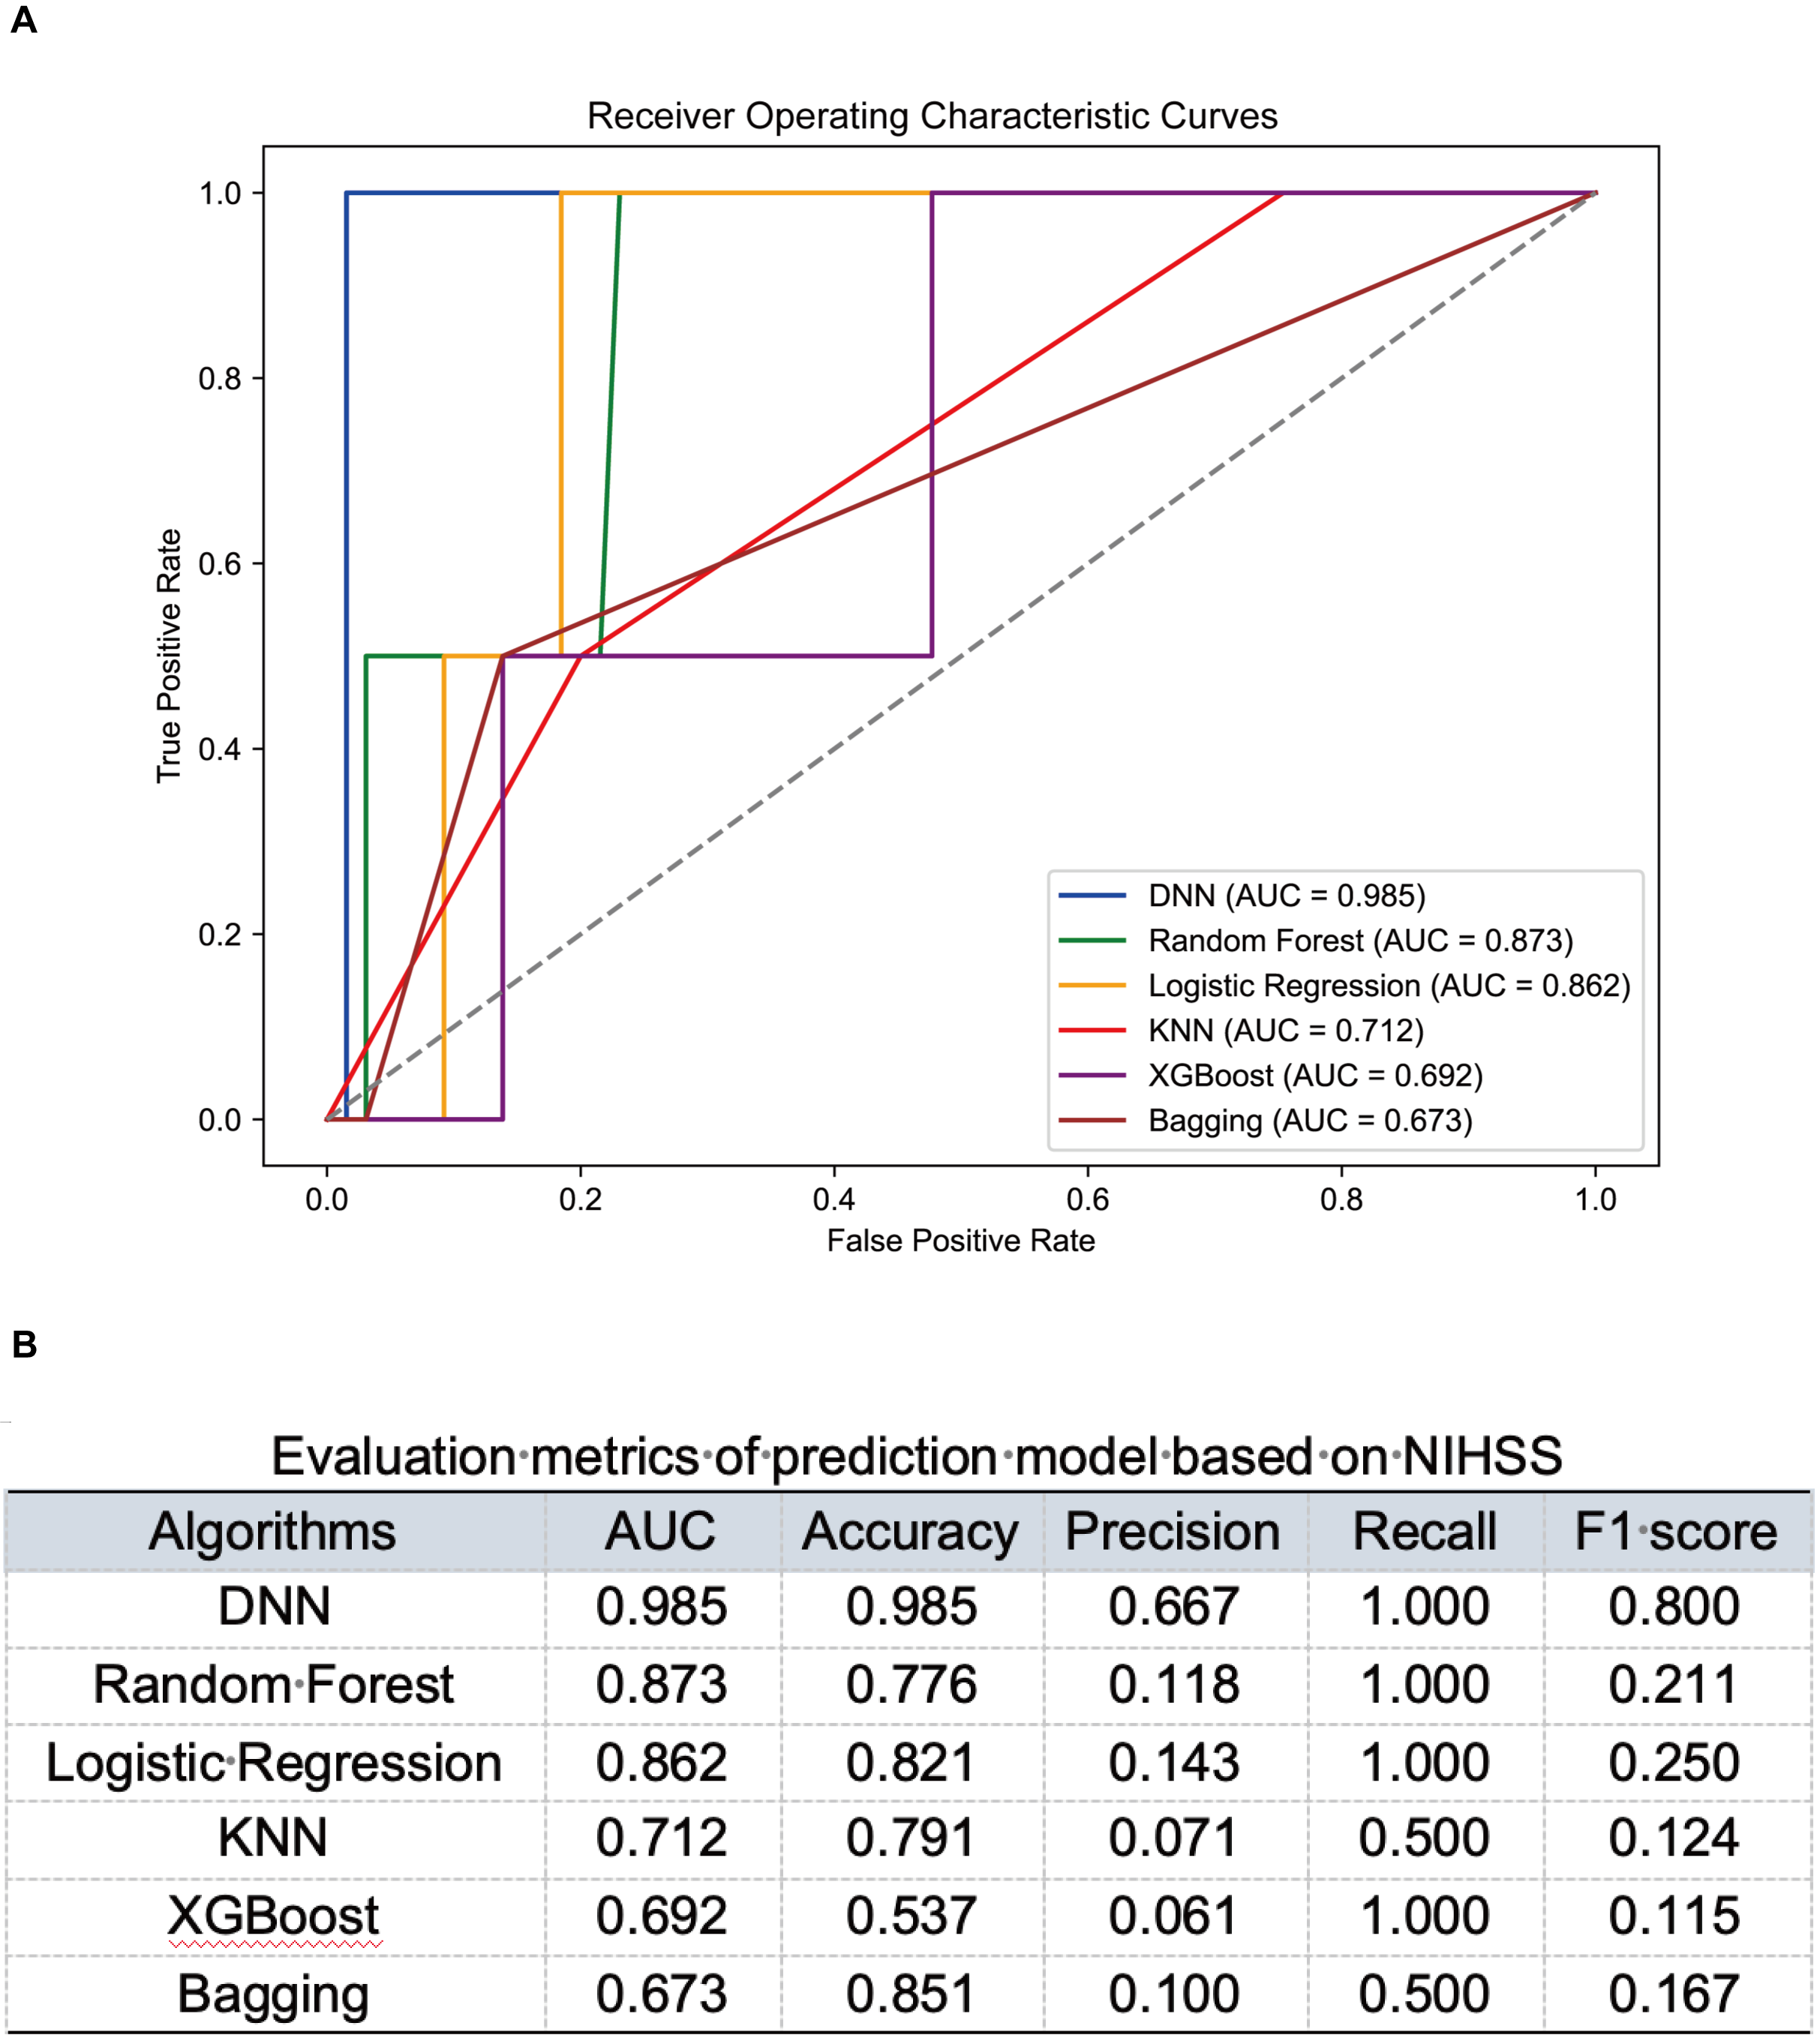


Supplementary Figure 1 DNN outperforms comparators in NIHSS Prognosis Prediction. (A) ROC curves of DNN, RF, LR, KNN, XGBoost, Bagging. (B) The evaluation metrics of the multiple models.


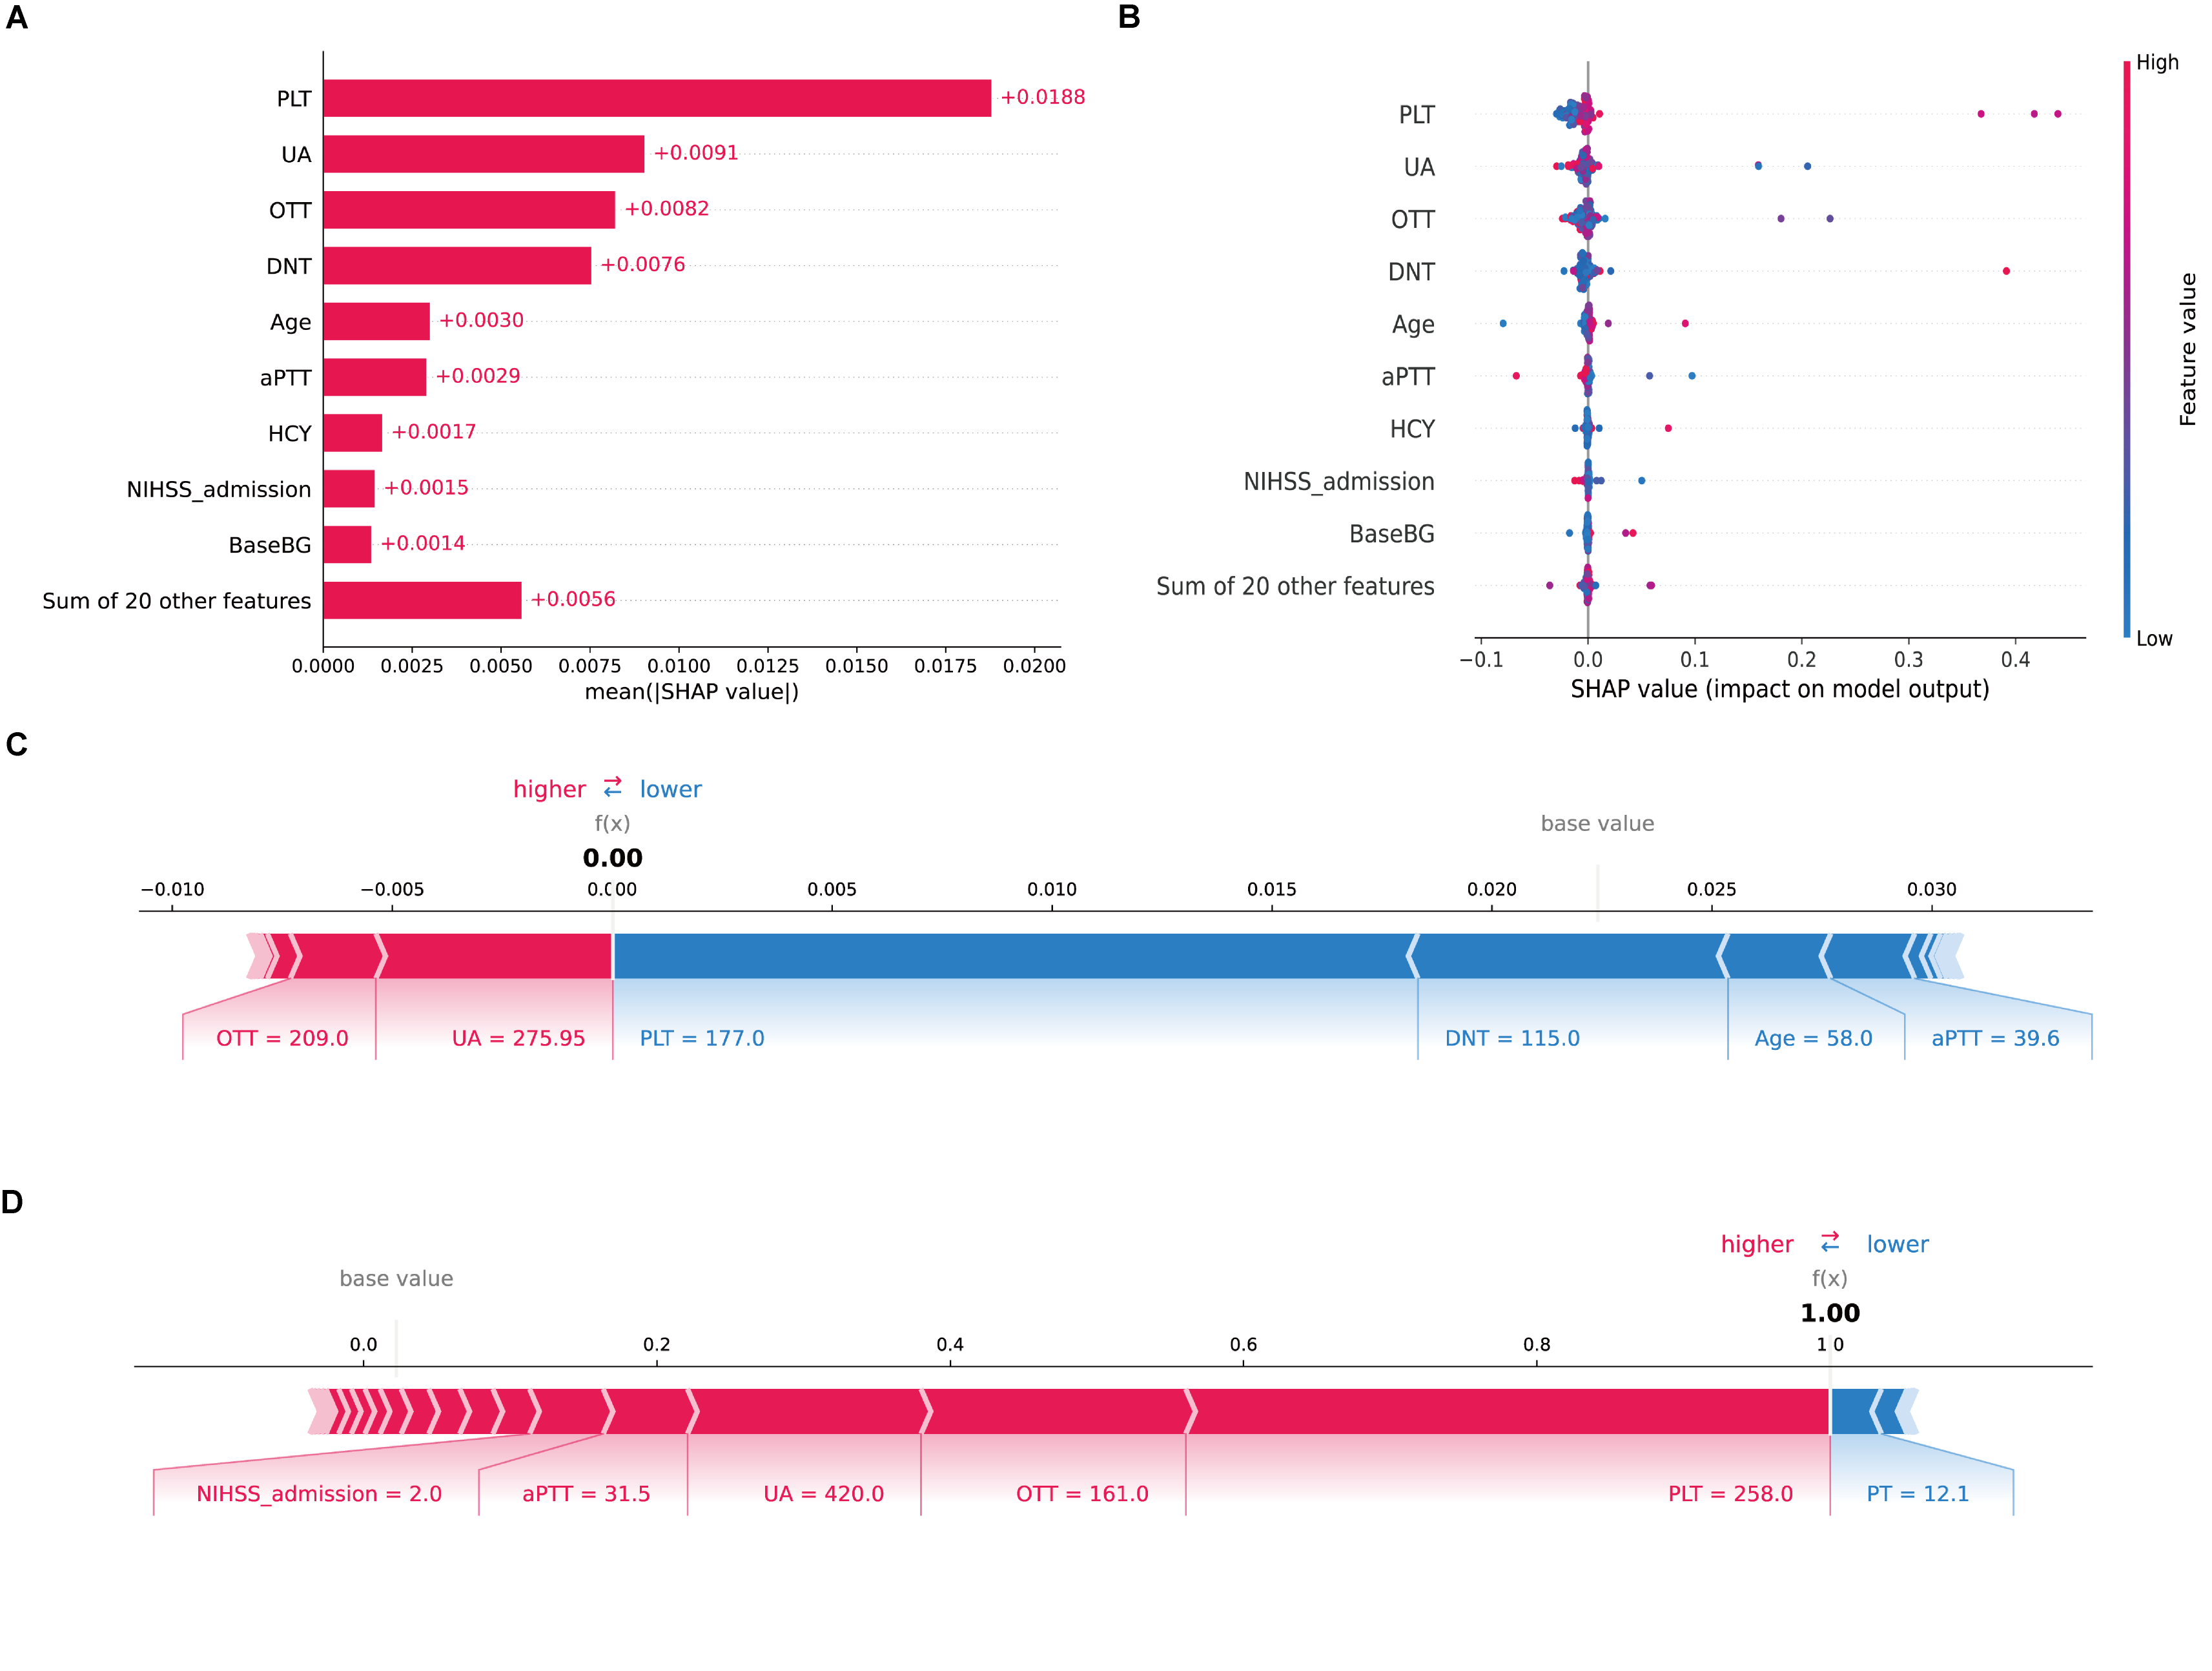


Supplementary Figure 2 SHAP Interpretation based on NIHSS model. (A) Feature Importance rank of bar plot. (B) Feature importance rank of beeswarm. (C-D) Force plots of the individual samples.


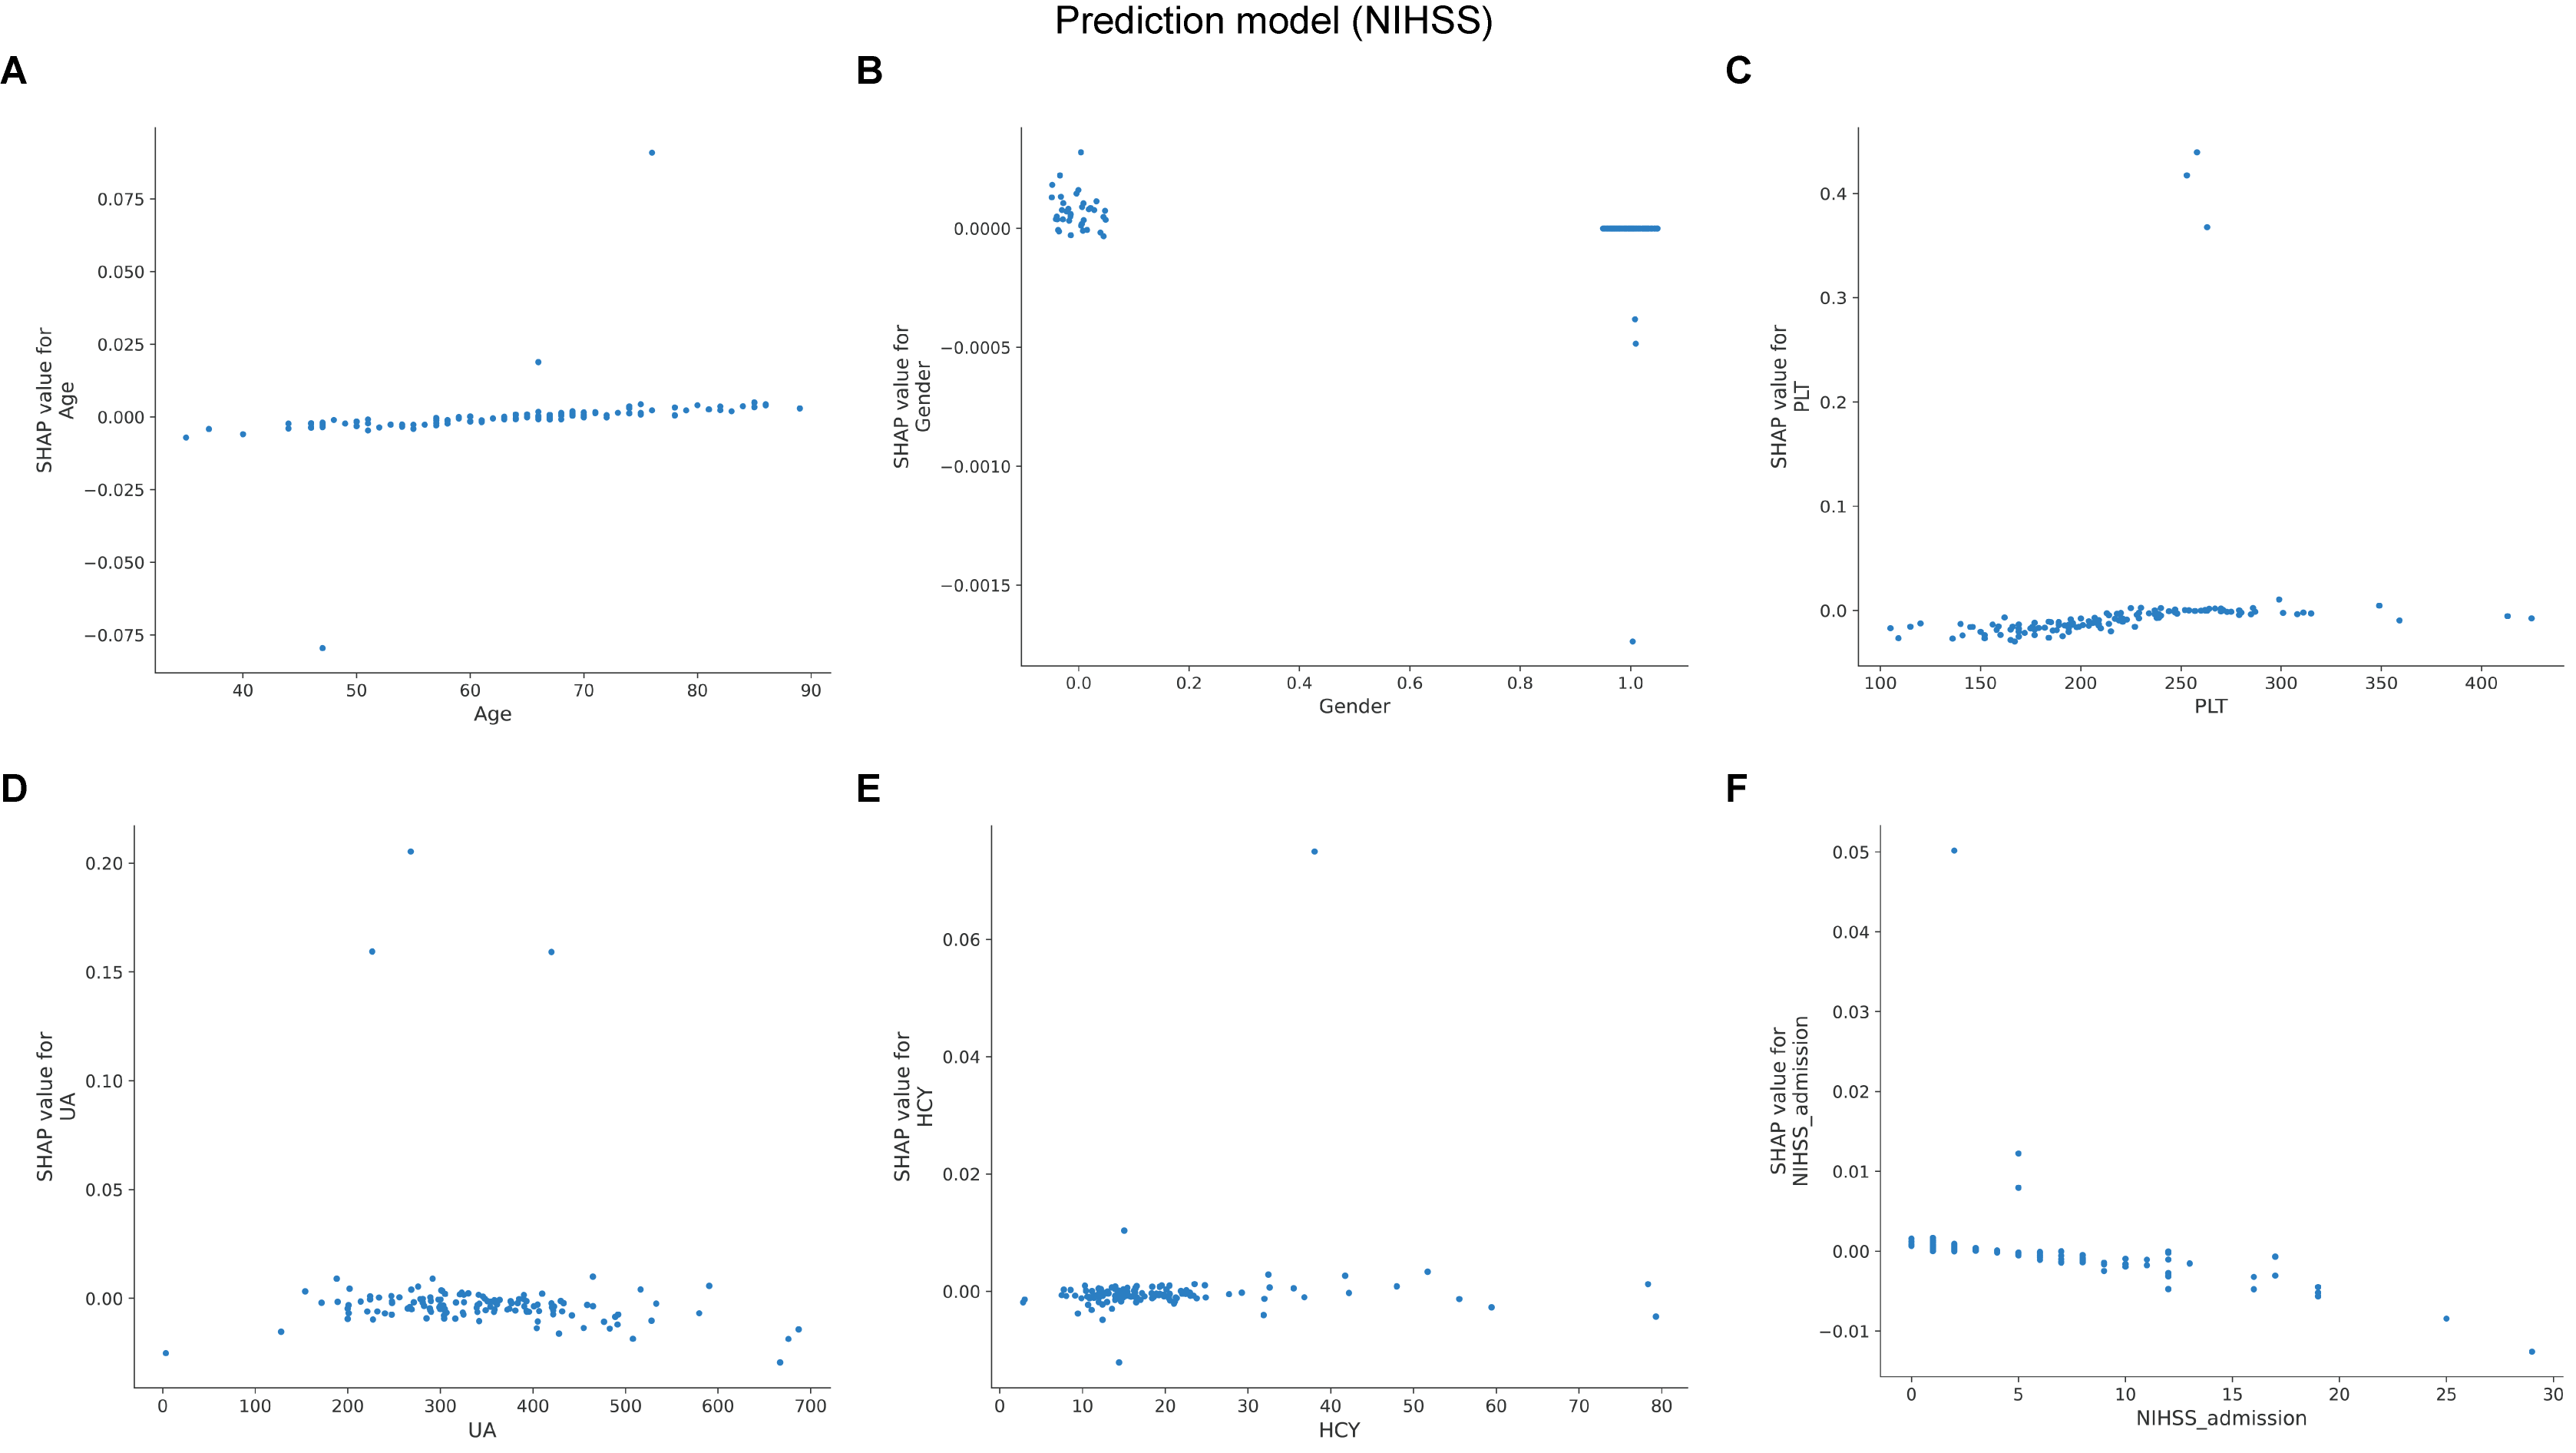


Supplementary Figure 3 SHAP Feature Dependence Plots based on NIHSS model. (A) Age (B) Gender (C) PLT (D) UA (E) HCY (F) NIHSS_admission.


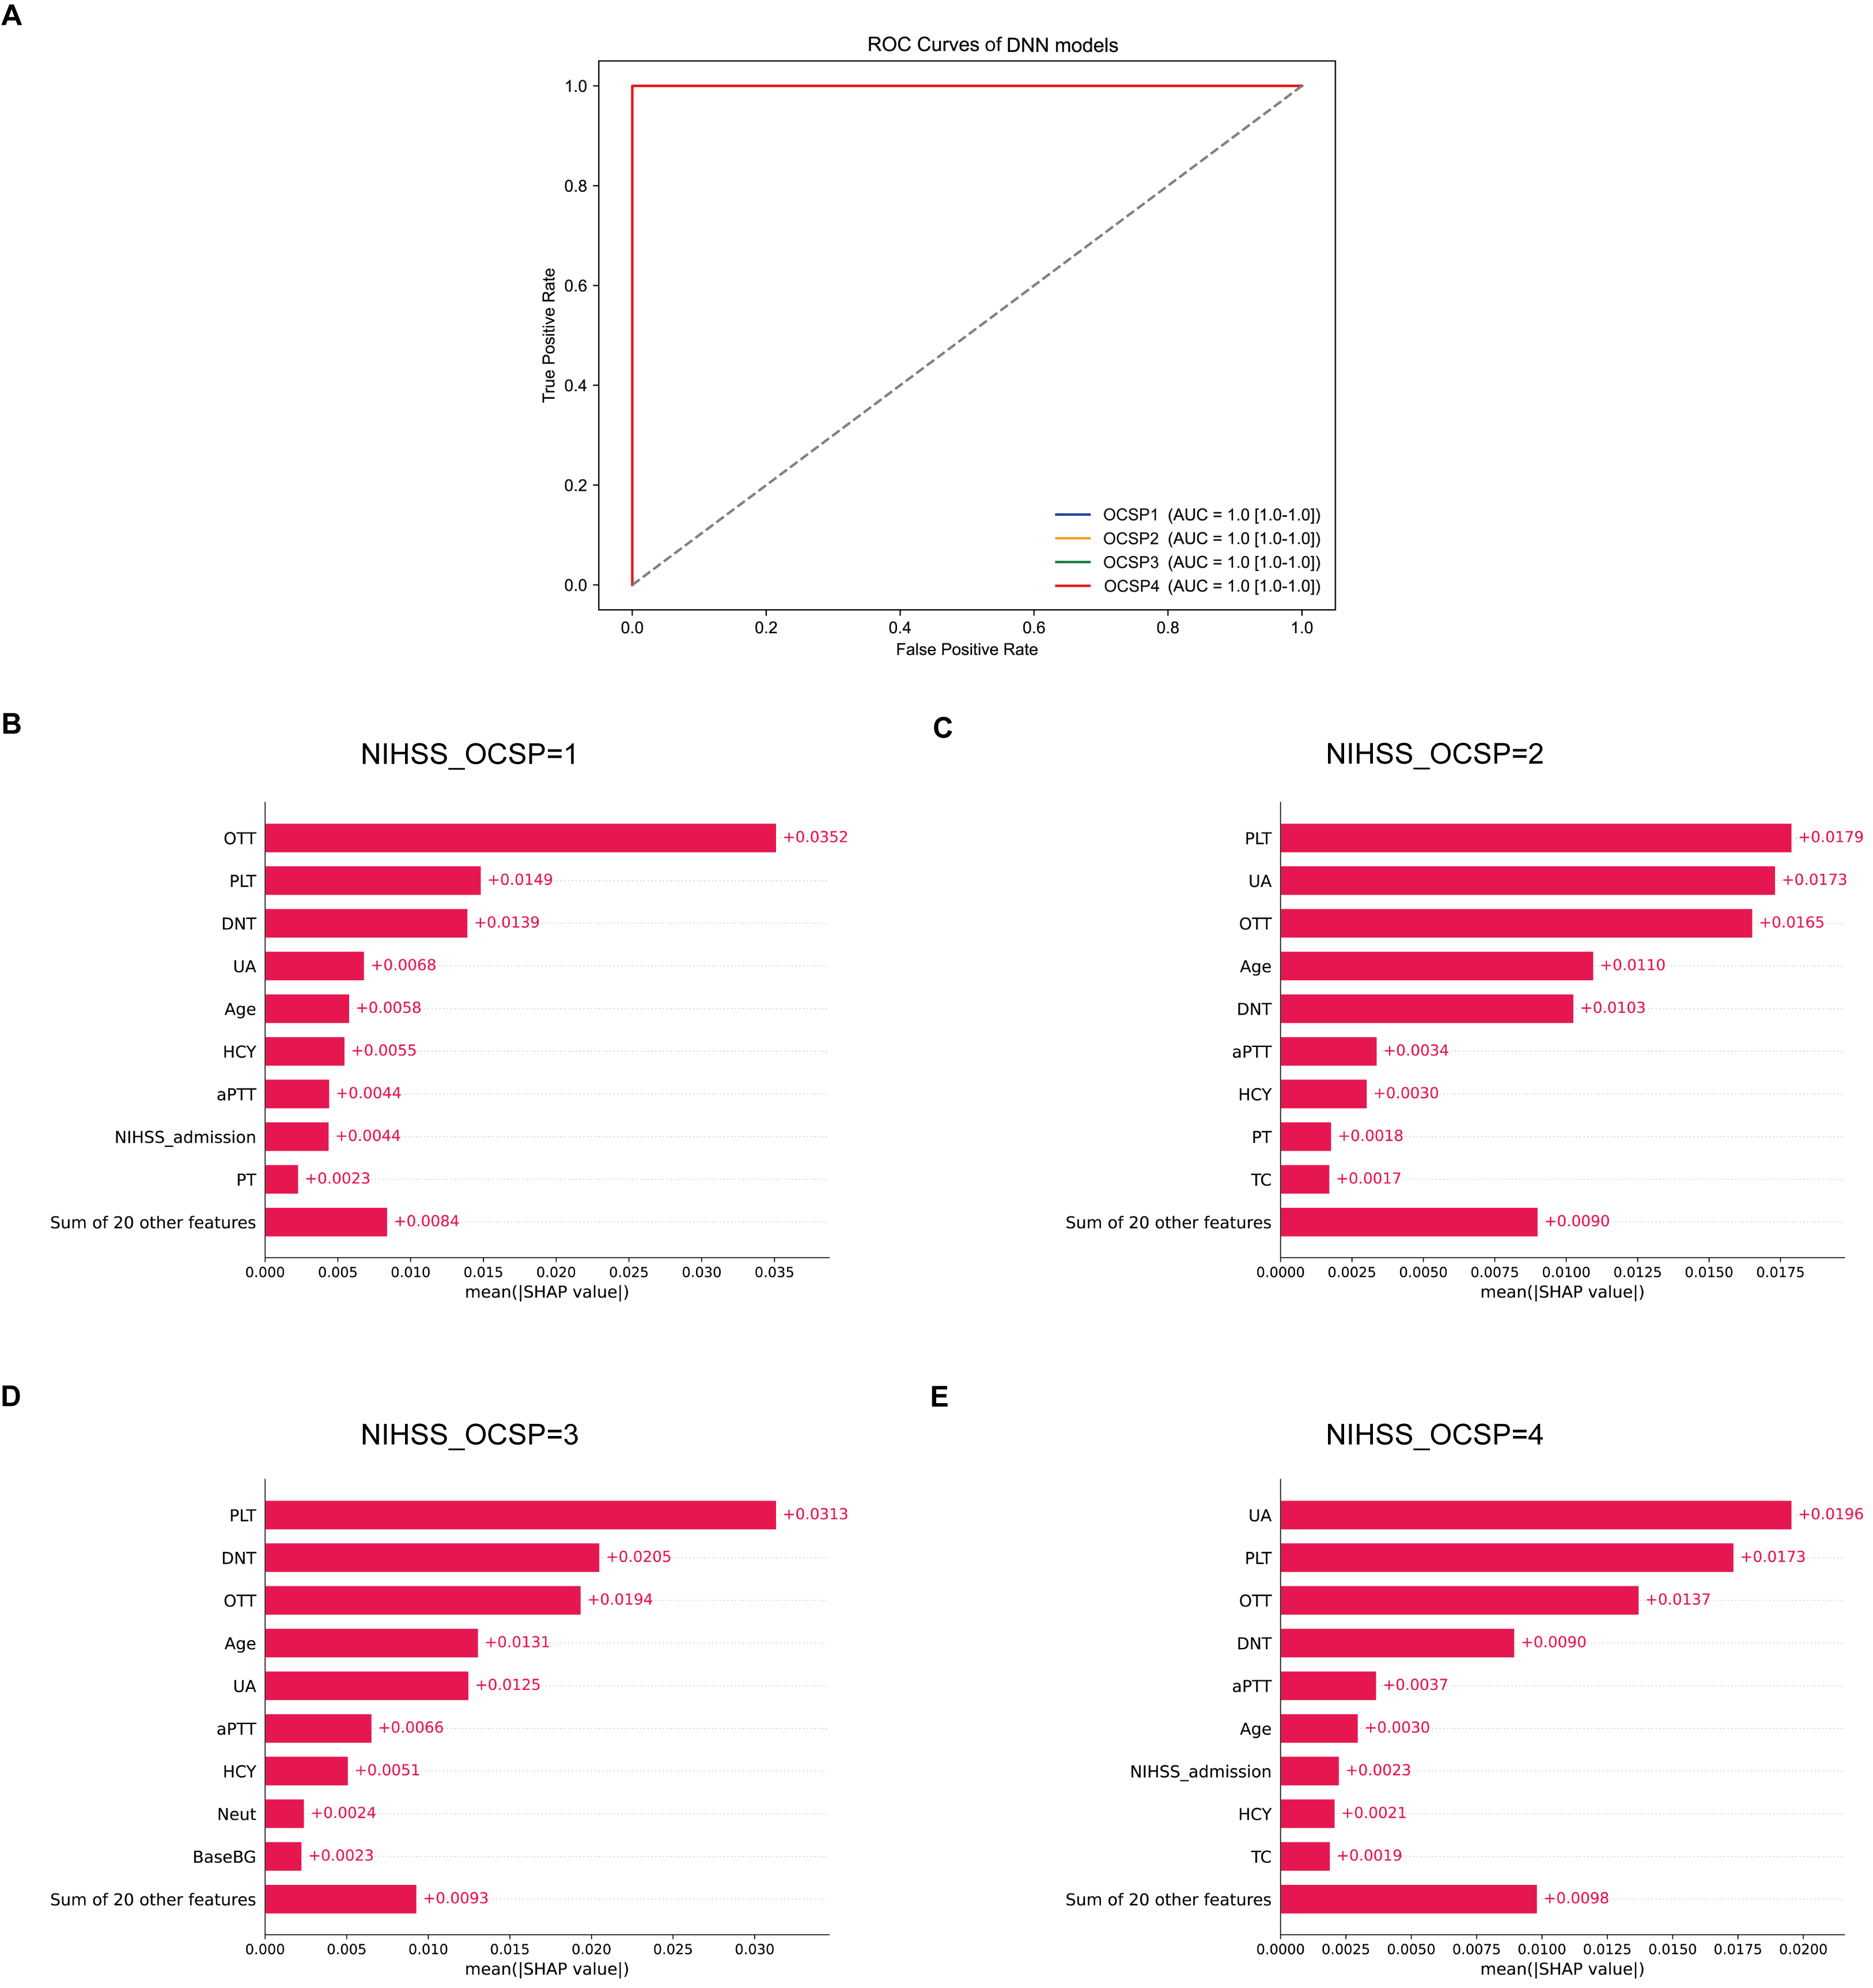


Supplementary Figure 4 Clinically Stratification analysis based on OCSP for NIHSS model. (A) ROC curves for four OCSP groups. (B-E) Feature Importance analysis in OCSP subgroups.


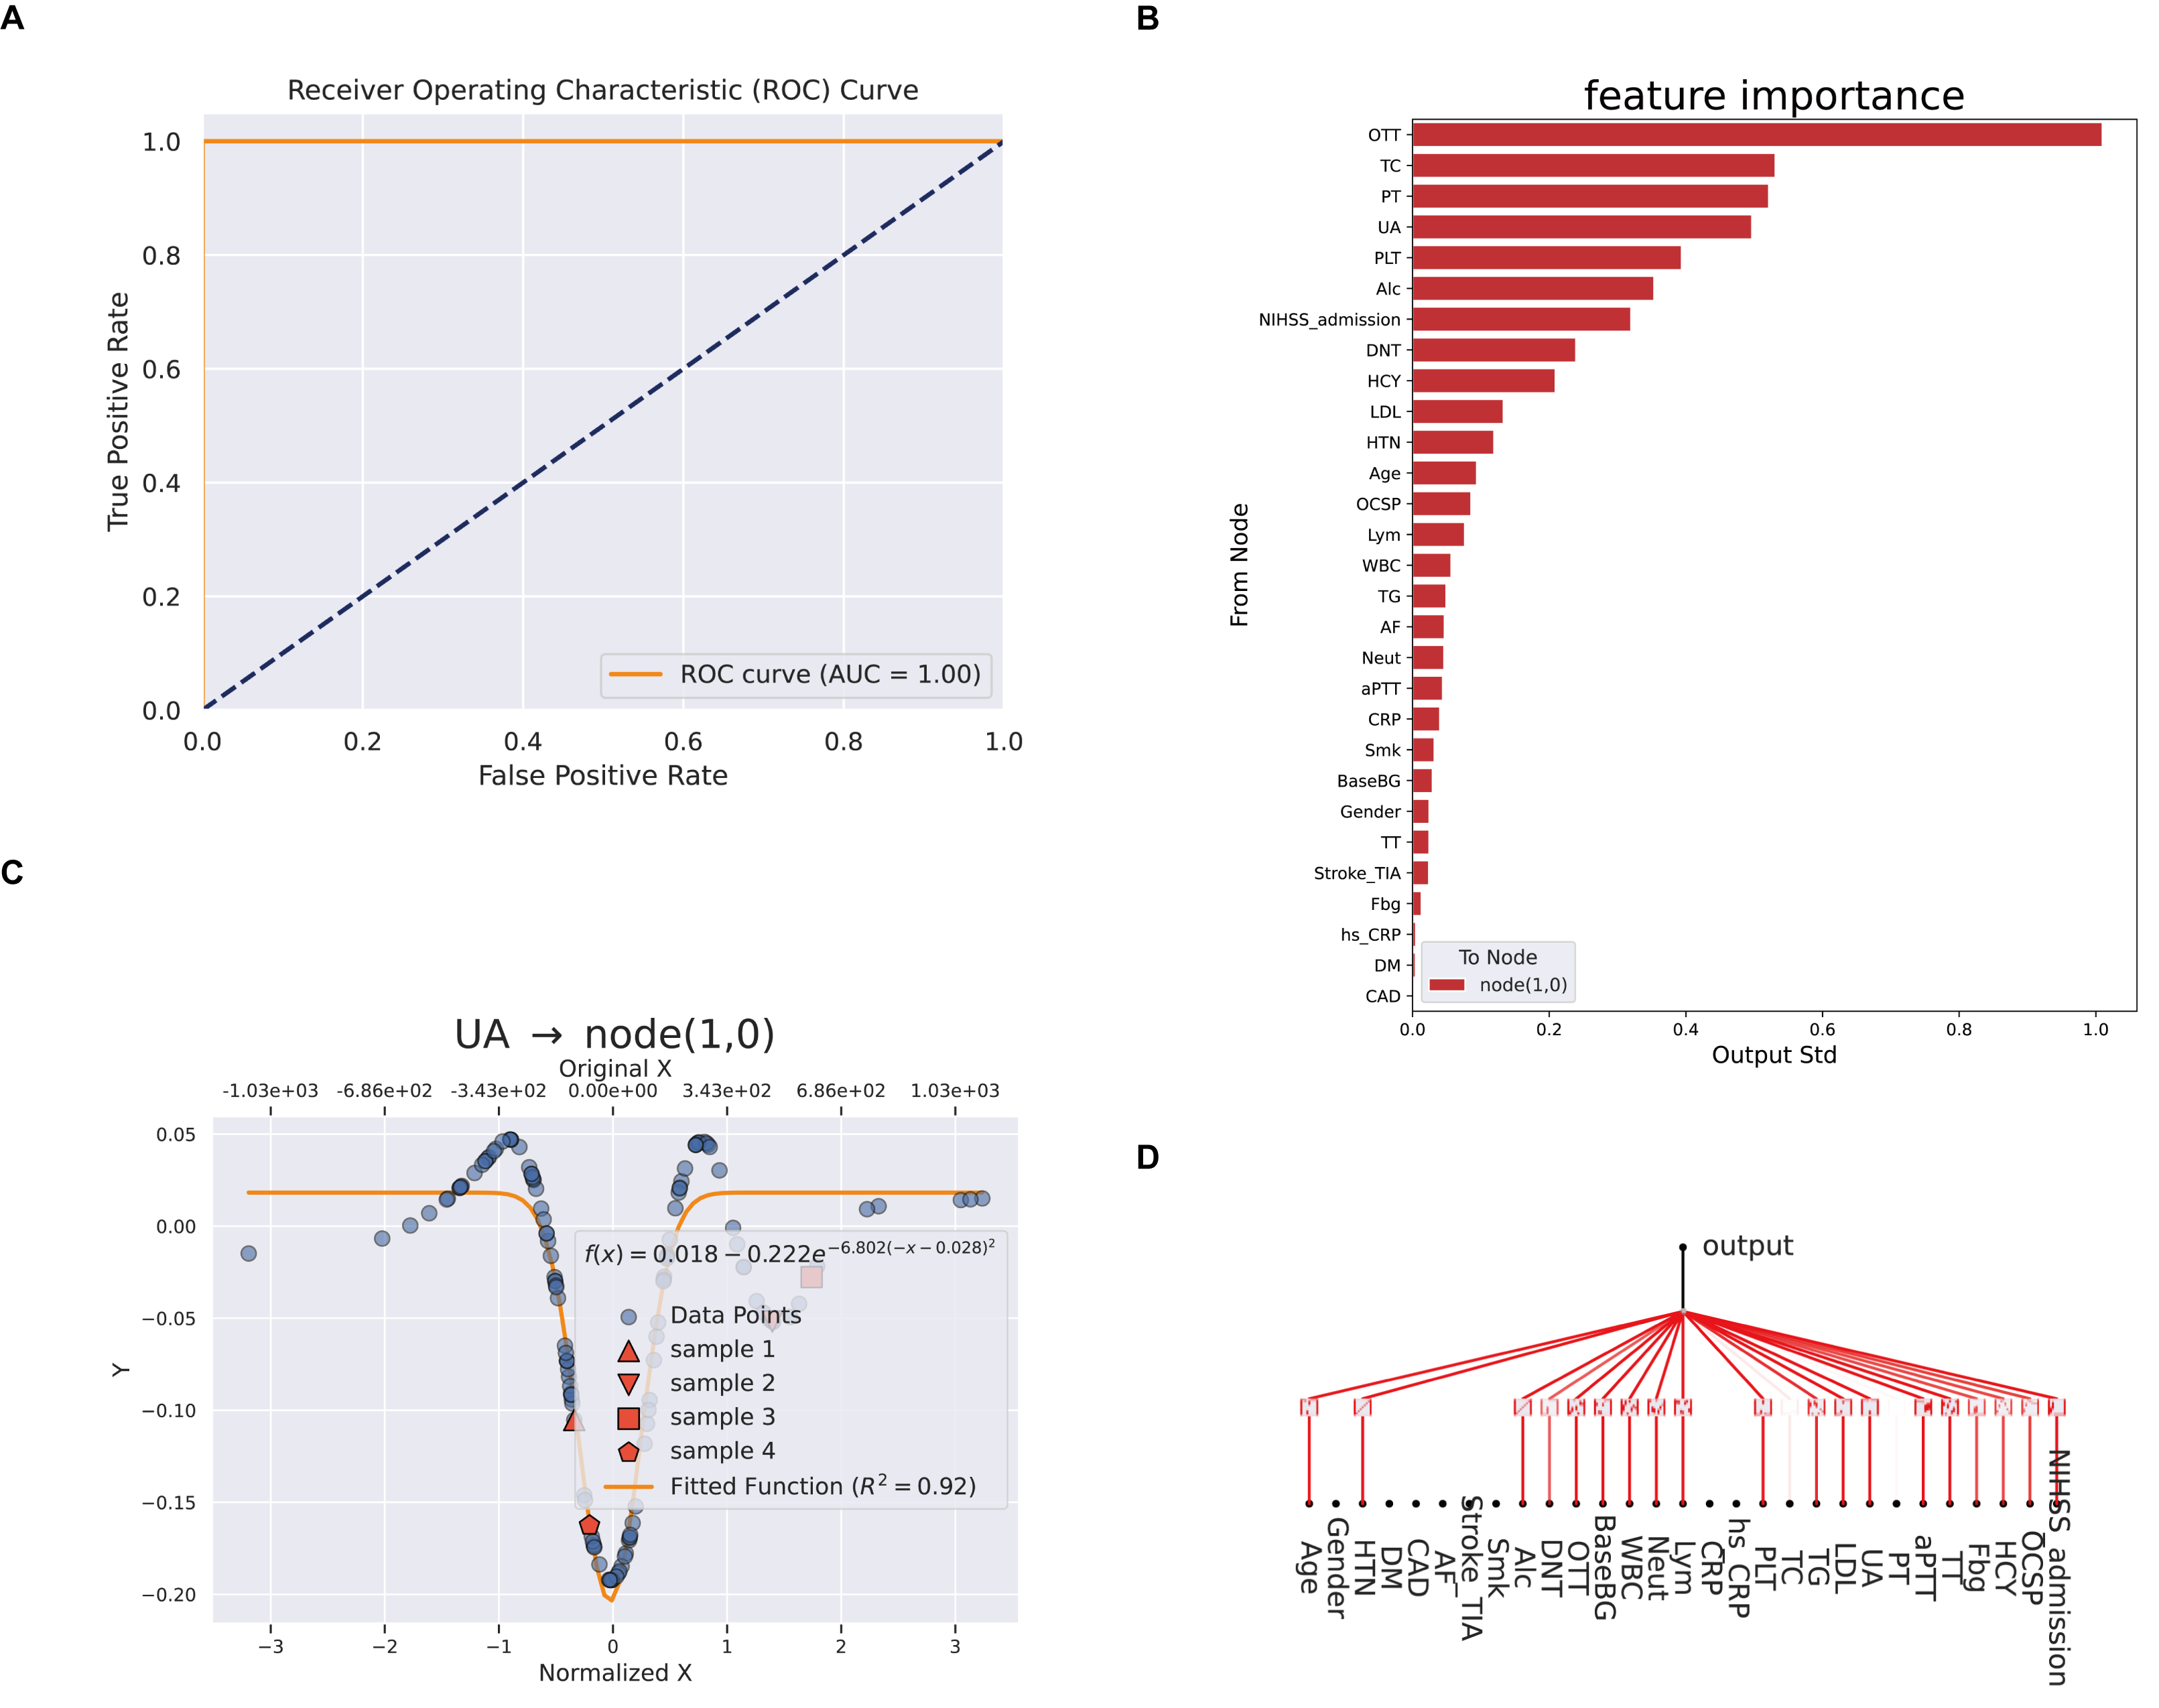


Supplementary Figure 5 KAN interpretation for NIHSS model. (A) ROC curve (B) Feature importance rank (C) The fitting curve of UA to prediction outcome. (D) KAN network analysis.


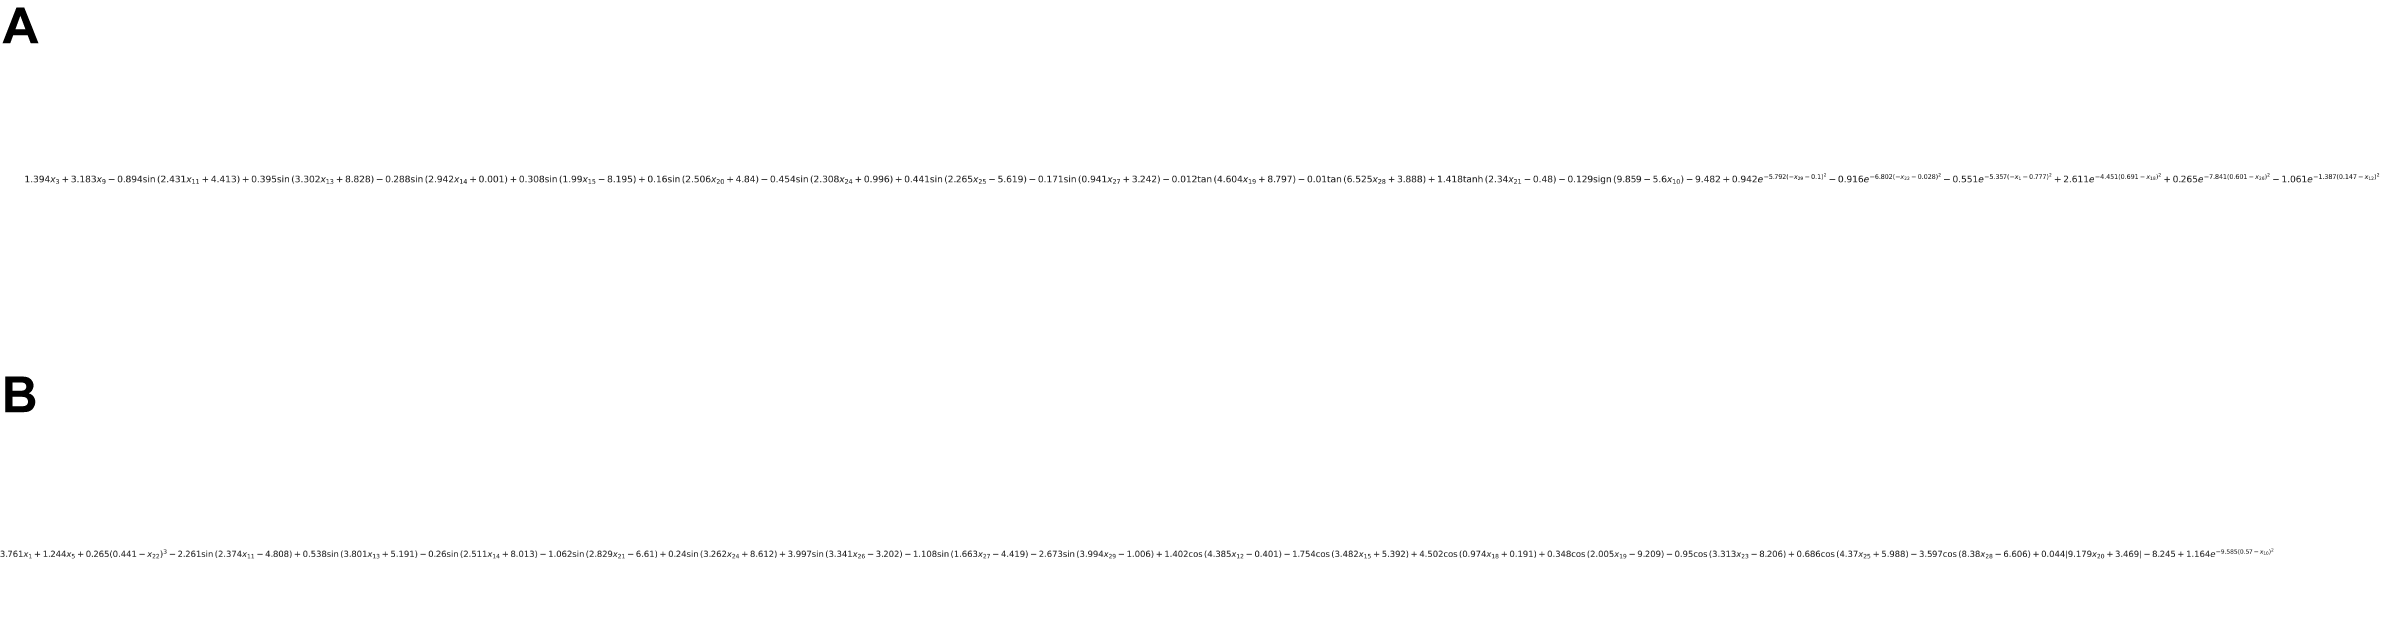


Supplementary Figure 6 The formulas generated by KAN. (A) mRS model (B) NIHSS model.


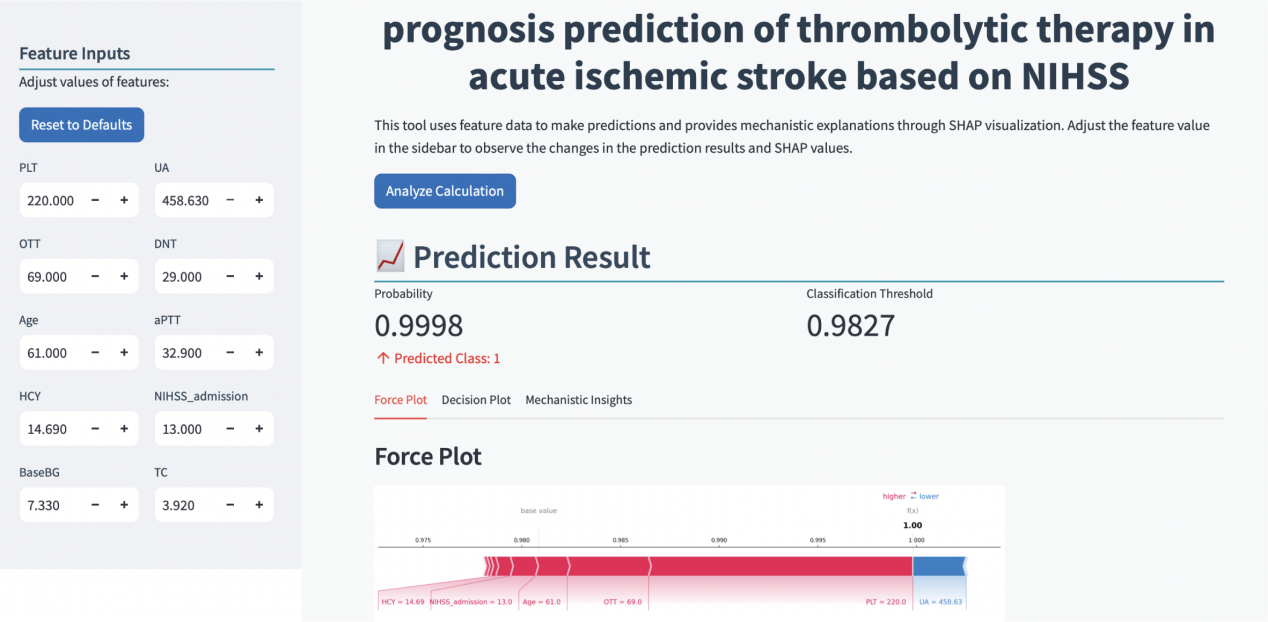


Supplementary Figure 7 Online predictive model based on NIHSS model.

Supplementary Table

Supplementary Table 1 Baseline information of patients based on NIHSS prediction model

|  | NIHSS | |  |
| --- | --- | --- | --- |
| Characteristics | 0 | 1 | P value |
| n | 196 | 5 |  |
| Age, mean ± sd | 64.913 ± 11.024 | 61.2 ± 13.027 | 0.460 |
| Gender, n (%) |  |  | 0.986 |
| Male | 136 (67.7%) | 4 (2%) |  |
| Female | 60 (29.9%) | 1 (0.5%) |  |
| hypertension, n (%) |  |  | 0.843 |
| No | 62 (30.8%) | 1 (0.5%) |  |
| Yes | 133 (66.2%) | 4 (2%) |  |
| N/A | 1 (0.5%) | 0 (0%) |  |
| diabetes mellitus, n (%) |  |  | 1.000 |
| No | 137 (68.2%) | 3 (1.5%) |  |
| Yes | 59 (29.4%) | 2 (1%) |  |
| coronary artery disease,  n (%) |  |  | 1.000 |
| No | 163 (81.1%) | 4 (2%) |  |
| Yes | 33 (16.4%) | 1 (0.5%) |  |
| atrial fibrillation, n (%) |  |  | 1.000 |
| No | 178 (88.6%) | 5 (2.5%) |  |
| Yes | 18 (9%) | 0 (0%) |  |
| Stroke/TIA, n (%) |  |  | 0.777 |
| No | 111 (55.2%) | 2 (1%) |  |
| Yes | 85 (42.3%) | 3 (1.5%) |  |
| Smoke, n (%) |  |  | 0.991 |
| Yes | 97 (48.3%) | 3 (1.5%) |  |
| No | 99 (49.3%) | 2 (1%) |  |
| Alcohol, n (%) |  |  | 0.251 |
| Yes | 86 (42.8%) | 4 (2%) |  |
| No | 110 (54.7%) | 1 (0.5%) |  |
| OCSP, n (%) |  |  | 0.841 |
| TACI | 22 (10.9%) | 1 (0.5%) |  |
| POCI | 74 (36.8%) | 1 (0.5%) |  |
| LACI | 30 (14.9%) | 1 (0.5%) |  |
| LI | 70 (34.8%) | 2 (1%) |  |
